# Supplementary material for: The involvement of vimentin in copper-induced regression of cardiomyocyte hypertrophy
Source: Royal Society of Chemistry journal article supplement (doi:10.1039/c5mt00094g), 2015-01-01
Supplement: c5mt00094g1.pdf [file c5mt00094g1.pdf]

**Supplement table:** Identification of a 56 kDa Cu-binding protein, vimentin, as an adaptor protein linking VEGFR-1 and PKG-1. (A) Proteins pulled down by agarose-conjugated VEGFR-1 antibody. HCM were treated with 100  $\mu$ M PE for 48 h in serum-free media before the treatment with 5  $\mu$ M copper element for additional 24 h in the presence of PE. The supernatant was collected by Co-IP and analyzed using LC-MS/MS. (B) Proteins pulled down by agarose-conjugated PKG-1 antibody. The treatment protocol was the same as above. PE: phenylephrine; VEGFR-1: vascular endothelial growth factor receptor 1; PKG-1: cyclic guanosine monophosphate (cGMP)-dependent protein kinase-1; HCM: human cardiac myocytes; Co-IP: co-immunoprecipitation; LC-MS/MS: liquid chromatography-tandem mass spectrometry.

Tab S1A. Proteins pulled down by agarose-conjugated VEGFR-1 antibody.

| Control                                  | PE                                       | Cu                                       | PE+Cu                                     |
|------------------------------------------|------------------------------------------|------------------------------------------|-------------------------------------------|
| 10 kDa heat shock protein, mitochondrial |                                          | 10 kDa heat shock protein, mitochondrial |                                           |
| 60 kDa heat shock protein, mitochondrial | 60 kDa heat shock protein, mitochondrial |                                          | 60 kDa heat shock protein, mitochondrial  |
|                                          |                                          |                                          | ATP synthase subunit alpha, mitochondrial |
| 14-3-3 protein beta/alpha                | 14-3-3 protein beta/alpha                | 14-3-3 protein beta/alpha                | 14-3-3 protein beta/alpha                 |
| 14-3-3 protein gamma                     | 14-3-3 protein gamma                     | 14-3-3 protein gamma                     | 14-3-3 protein gamma                      |
| 14-3-3 protein zeta/delta                | 14-3-3 protein zeta/delta                | 14-3-3 protein zeta/delta                | 14-3-3 protein zeta/delta                 |
| 14-3-3 protein eta                       |                                          |                                          | 14-3-3 protein eta                        |
| 14-3-3 protein theta                     | 14-3-3 protein theta                     | 14-3-3 protein theta                     | 14-3-3 protein theta                      |
| 14-3-3 protein epsilon                   | 14-3-3 protein epsilon                   | 14-3-3 protein epsilon                   | 14-3-3 protein epsilon                    |
|                                          |                                          |                                          | 14-3-3 protein sigma                      |
| 40S ribosomal protein SA                  |
| 40S ribosomal protein S3                  |
|                                          |                                          |                                          | 40S ribosomal protein S6                  |
| 40S ribosomal protein S12                |                                          |                                          |                                           |
| 40S ribosomal protein S18                 |
| 60S acidic ribosomal protein P2          | 60S acidic ribosomal protein P2          |                                          | 60S acidic ribosomal protein P2           |
|                                          | 60S ribosomal protein L7                 |                                          |                                           |
| 60S ribosomal protein L11                |                                          |                                          |                                           |
|                                          |                                          |                                          | 60S ribosomal protein L14                 |

|                                       |                                    |                                    |                                       |
|---------------------------------------|------------------------------------|------------------------------------|---------------------------------------|
|                                       |                                    | 60S ribosomal protein L18          |                                       |
| 78 kDa glucose-regulated protein      | 78 kDa glucose-regulated protein   | 78 kDa glucose-regulated protein   | 78 kDa glucose-regulated protein      |
| Acyl-CoA-binding protein              | Acyl-CoA-binding protein           |                                    | Acyl-CoA-binding protein              |
|                                       | ADP-ribosylation factor 1          |                                    | ADP-ribosylation factor 1             |
|                                       | ADP-ribosylation factor 3          |                                    | ADP-ribosylation factor 3             |
|                                       | ADP-ribosylation factor 4          |                                    | ADP-ribosylation factor 4             |
|                                       | ADP-ribosylation factor 5          |                                    | ADP-ribosylation factor 5             |
|                                       |                                    |                                    | ATP-dependent RNA helicase DDX39      |
| Actin, alpha cardiac muscle 1         | Actin, alpha cardiac muscle 1      | Actin, alpha cardiac muscle 1      | Actin, alpha cardiac muscle 1         |
| Actin, alpha skeletal muscle          | Actin, alpha skeletal muscle       | Actin, alpha skeletal muscle       | Actin, alpha skeletal muscle          |
| Actin, aortic smooth muscle           | Actin, aortic smooth muscle        | Actin, aortic smooth muscle        | Actin, aortic smooth muscle           |
| Actin, gamma-enteric smooth muscle    | Actin, gamma-enteric smooth muscle | Actin, gamma-enteric smooth muscle | Actin, gamma-enteric smooth muscle    |
| Actin, cytoplasmic 1                  | Actin, cytoplasmic 1               | Actin, cytoplasmic 1               | Actin, cytoplasmic 1                  |
| Actin, cytoplasmic 2                  | Actin, cytoplasmic 2               | Actin, cytoplasmic 2               | Actin, cytoplasmic 2                  |
| Adenylyl cyclase-associated protein 1 |                                    |                                    | Adenylyl cyclase-associated protein 1 |
| Alpha-actinin-1                       | Alpha-actinin-1                    |                                    | Alpha-actinin-1                       |
| Alpha-actinin-4                       | Alpha-actinin-4                    |                                    | Alpha-actinin-4                       |
| Annexin A1                            | Annexin A1                         | Annexin A1                         | Annexin A1                            |
| Annexin A2                            | Annexin A2                         | Annexin A2                         | Annexin A2                            |
| Annexin A5                            | Annexin A5                         | Annexin A5                         | Annexin A5                            |
|                                       |                                    | Astrocytic phosphoprotein PEA-15   |                                       |

|                                                    |                                                    |                                                    |                                                    |
|----------------------------------------------------|----------------------------------------------------|----------------------------------------------------|----------------------------------------------------|
| Brain acid soluble protein 1                       |                                                    |                                                    |                                                    |
| Calmodulin                                         | Calmodulin                                         | Calmodulin                                         | Calmodulin                                         |
| Calponin-2                                         | Calponin-2                                         |                                                    | Calponin-2                                         |
|                                                    |                                                    |                                                    | Calreticulin                                       |
| Calumenin                                          | Calumenin                                          |                                                    | Calumenin                                          |
| Cathepsin B                                        | Cathepsin B                                        | Cathepsin B                                        | Cathepsin B                                        |
|                                                    |                                                    |                                                    | Chloride intracellular channel protein 1           |
| Clathrin heavy chain 1                             | Clathrin heavy chain 1                             |                                                    | Clathrin heavy chain 1                             |
| Coactosin-like protein                             |                                                    |                                                    |                                                    |
| Cofilin-1                                          | Cofilin-1                                          | Cofilin-1                                          | Cofilin-1                                          |
| Cofilin-2                                          | Cofilin-2                                          | Cofilin-2                                          | Cofilin-2                                          |
| Complement component 1 Q subcomponent-binding prot |
| Cu-Zn Superoxide dismutase                         |                                                    |                                                    | Cu-Zn Superoxide dismutase                         |
| Cytochrome c                                       | Cytochrome c                                       | Cytochrome c                                       | Cytochrome c                                       |
| Cystatin-B                                         | Cystatin-B                                         | Cystatin-B                                         | Cystatin-B                                         |
|                                                    | DNA-binding protein A                              |                                                    |                                                    |
|                                                    | Desmoglein-1                                       |                                                    |                                                    |
| Alpha-enolase                                      | Alpha-enolase                                      | Alpha-enolase                                      | Alpha-enolase                                      |
| Beta-enolase                                       | Beta-enolase                                       | Beta-enolase                                       | Beta-enolase                                       |
|                                                    |                                                    | ELAV-like protein 1                                | ELAV-like protein 1                                |
| Elongation factor 1-alpha 1                        |

|                                               |                                               |                                               |                                               |
|-----------------------------------------------|-----------------------------------------------|-----------------------------------------------|-----------------------------------------------|
| Elongation factor 1-alpha 2                   |
|                                               |                                               |                                               | Elongation factor 1-gamma                     |
| Elongation factor 2                           | Elongation factor 2                           | Elongation factor 2                           | Elongation factor 2                           |
| Endoplasmin                                   |                                               | Endoplasmin                                   | Endoplasmin                                   |
|                                               |                                               |                                               | Epididymal secretory protein E1               |
| Eukaryotic initiation factor 4A-I             |
| Eukaryotic initiation factor 4A-II            |
| Eukaryotic translation initiation factor 5A-1 |
| Eukaryotic translation initiation factor 5A-2 |
|                                               | Ezrin                                         |                                               | Ezrin                                         |
| Far upstream element-binding protein 1        |                                               | Far upstream element-binding protein 1        | Far upstream element-binding protein 1        |
| Filamin-A                                     | Filamin-A                                     | Filamin-A                                     | Filamin-A                                     |
| Filamin-B                                     | Filamin-B                                     |                                               |                                               |
| Filamin-C                                     | Filamin-C                                     |                                               |                                               |
| Fructose-bisphosphate aldolase A              |                                               | Fructose-bisphosphate aldolase A              | Fructose-bisphosphate aldolase A              |
| GTP-binding nuclear protein Ran               | GTP-binding nuclear protein Ran               |                                               | GTP-binding nuclear protein Ran               |
| Galectin-1                                    | Galectin-1                                    | Galectin-1                                    |                                               |
| Gamma-glutamyl hydrolase                      |                                               | Gamma-glutamylcyclotransferase                |                                               |
| Glucosidase 2 subunit beta                    |                                               |                                               | Glucosidase 2 subunit beta                    |
|                                               |                                               |                                               | Glutathione S-transferase P                   |
| Glyceraldehyde-3-phosphate                    | Glyceraldehyde-3-phosphate                    | Glyceraldehyde-3-phosphate                    | Glyceraldehyde-3-phosphate                    |

|                                                     |                                                |                                                   |                                                   |
|-----------------------------------------------------|------------------------------------------------|---------------------------------------------------|---------------------------------------------------|
| dehydrogenase                                       | dehydrogenase                                  | dehydrogenase                                     | dehydrogenase                                     |
| Guanine nucleotide-binding protein subunit beta-2-l |                                                | Guanine nucleotide-binding protein subunit beta-2 | Guanine nucleotide-binding protein subunit beta-2 |
| Heat shock protein beta-1                           | Heat shock protein beta-1                      | Heat shock protein beta-1                         | Heat shock protein beta-1                         |
| Heat shock 70 kDa protein 1A/1B                     | Heat shock 70 kDa protein 1A/1B                | Heat shock 70 kDa protein 1A/1B                   | Heat shock 70 kDa protein 1A/1B                   |
| Heat shock 70 kDa protein 6                         | Heat shock 70 kDa protein 6                    | Heat shock 70 kDa protein 6                       | Heat shock 70 kDa protein 6                       |
| Heat shock cognate 71 kDa protein                   | Heat shock cognate 71 kDa protein              | Heat shock cognate 71 kDa protein                 | Heat shock cognate 71 kDa protein                 |
| Heat shock protein HSP 90-alpha                     | Heat shock protein HSP 90-alpha                | Heat shock protein HSP 90-alpha                   | Heat shock protein HSP 90-alpha                   |
| Heat shock protein HSP 90-beta                      | Heat shock protein HSP 90-beta                 | Heat shock protein HSP 90-beta                    | Heat shock protein HSP 90-beta                    |
| Hepatoma-derived growth factor                      | Hepatoma-derived growth factor                 |                                                   | Hepatoma-derived growth factor                    |
| Heterogeneous nuclear ribonucleoprotein A/B         | Heterogeneous nuclear ribonucleoprotein A/B    | Heterogeneous nuclear ribonucleoprotein A/B       | Heterogeneous nuclear ribonucleoprotein A/B       |
| Heterogeneous nuclear ribonucleoprotein A1          | Heterogeneous nuclear ribonucleoprotein A1     | Heterogeneous nuclear ribonucleoprotein A1        | Heterogeneous nuclear ribonucleoprotein A1        |
| Heterogeneous nuclear ribonucleoproteins A2/B1      | Heterogeneous nuclear ribonucleoproteins A2/B1 | Heterogeneous nuclear ribonucleoproteins A2/B1    | Heterogeneous nuclear ribonucleoproteins A2/B1    |
| Heterogeneous nuclear ribonucleoproteins C1/C2      | Heterogeneous nuclear ribonucleoproteins C1/C2 | Heterogeneous nuclear ribonucleoproteins C1/C2    | Heterogeneous nuclear ribonucleoproteins C1/C2    |
| Heterogeneous nuclear ribonucleoprotein D0          | Heterogeneous nuclear ribonucleoprotein D0     | Heterogeneous nuclear ribonucleoprotein D0        | Heterogeneous nuclear ribonucleoprotein D0        |
| Heterogeneous nuclear ribonucleoprotein F           | Heterogeneous nuclear ribonucleoprotein F      | Heterogeneous nuclear ribonucleoprotein F         | Heterogeneous nuclear ribonucleoprotein F         |
| Heterogeneous nuclear ribonucleoprotein G           | Heterogeneous nuclear ribonucleoprotein G      | Heterogeneous nuclear ribonucleoprotein G         | Heterogeneous nuclear ribonucleoprotein G         |
| Heterogeneous nuclear ribonucleoprotein H           | Heterogeneous nuclear ribonucleoprotein H      | Heterogeneous nuclear ribonucleoprotein H         | Heterogeneous nuclear ribonucleoprotein H         |
|                                                     | Heterogeneous nuclear ribonucleoprotein H2     | Heterogeneous nuclear ribonucleoprotein H2        | Heterogeneous nuclear ribonucleoprotein H2        |

|                                                    |                                             |                                                    |                                                |
|----------------------------------------------------|---------------------------------------------|----------------------------------------------------|------------------------------------------------|
| Heterogeneous nuclear ribonucleoprotein H3         |                                             | Heterogeneous nuclear ribonucleoprotein H3         | Heterogeneous nuclear ribonucleoprotein H3     |
| Heterogeneous nuclear ribonucleoprotein K          | Heterogeneous nuclear ribonucleoprotein K   | Heterogeneous nuclear ribonucleoprotein K          | Heterogeneous nuclear ribonucleoprotein K      |
| High mobility group protein B1                     | High mobility group protein B1              | High mobility group protein B1                     | High mobility group protein B1                 |
| Histone H2A type 1-B/E                             |                                             |                                                    |                                                |
| Histone H2A type 1-C                               |                                             |                                                    |                                                |
| Histone H2A type 1-D                               |                                             |                                                    |                                                |
| Histone H2A type 1-H                               |                                             |                                                    |                                                |
| Histone H2A type 1-J                               |                                             |                                                    |                                                |
| Histone H4                                         | Histone H4                                  |                                                    |                                                |
| Integrin beta-1                                    |                                             |                                                    |                                                |
|                                                    | Importin subunit beta-1                     |                                                    | Importin subunit beta-1                        |
| L-lactate dehydrogenase A chain                    | L-lactate dehydrogenase A chain             | L-lactate dehydrogenase A chain                    | L-lactate dehydrogenase A chain                |
| L-lactate dehydrogenase B chain                    | L-lactate dehydrogenase B chain             | L-lactate dehydrogenase B chain                    | L-lactate dehydrogenase B chain                |
| Lamin-A/C                                          | Lamin-A/C                                   | Lamin-A/C                                          | Lamin-A/C                                      |
| Lamina-associated polypeptide 2, isoform alpha     |                                             | Lamina-associated polypeptide 2, isoform alpha     | Lamina-associated polypeptide 2, isoform alpha |
| Lamina-associated polypeptide 2, isoforms beta/gam |                                             | Lamina-associated polypeptide 2, isoforms beta/gam |                                                |
| Lysosome-associated membrane glycoprotein 2        | Lysosome-associated membrane glycoprotein 2 |                                                    | Lysosome-associated membrane glycoprotein 2    |
|                                                    | Microtubule-associated protein 1B           | Microtubule-associated protein 1B                  |                                                |
| Microtubule-associated protein 4                   |                                             | Microtubule-associated protein 4                   | Microtubule-associated protein 4               |
| Moesin                                             | Moesin                                      | Moesin                                             | Moesin                                         |

|                                                     |                                                     |                                                     |                                                     |
|-----------------------------------------------------|-----------------------------------------------------|-----------------------------------------------------|-----------------------------------------------------|
| Myosin light polypeptide 6                          |
| Myosin light chain 6B                               |
| Myosin regulatory light polypeptide 9               |                                                     |                                                     | Myosin regulatory light polypeptide 9               |
| Myosin regulatory light chain 12A                   |
| Myosin regulatory light chain 12B                   |
| Myristoylated alanine-rich C-kinase substrate       |
|                                                     | N-acetylglucosamine-6-sulfatase                     |                                                     | N-acetylglucosamine-6-sulfatase                     |
| Nascent polypeptide-associated complex subunit alph |
| Nestin                                              |                                                     |                                                     |                                                     |
|                                                     | Nuclease-sensitive element-binding protein 1        |                                                     |                                                     |
| Nucleolar RNA helicase 2                            |                                                     |                                                     |                                                     |
| Nucleolin                                           | Nucleolin                                           | Nucleolin                                           | Nucleolin                                           |
| Nucleophosmin                                       | Nucleophosmin                                       | Nucleophosmin                                       | Nucleophosmin                                       |
| Nucleoside diphosphate kinase A                     |
| Nucleoside diphosphate kinase B                     |
| Neuroblast differentiation-associated protein AHNAK |
| POTE ankyrin domain family member E                 |
| Peptidyl-prolyl cis-trans isomerase A               |
| Peptidyl-prolyl cis-trans isomerase B               |
| Peroxiredoxin-1                                     | Peroxiredoxin-1                                     | Peroxiredoxin-1                                     | Peroxiredoxin-1                                     |



|                                                    |                                            |                                            |                                                    |
|----------------------------------------------------|--------------------------------------------|--------------------------------------------|----------------------------------------------------|
| Peroxiredoxin-2                                    | Peroxiredoxin-2                            | Peroxiredoxin-2                            | Peroxiredoxin-2                                    |
| Peroxiredoxin-6                                    | Peroxiredoxin-6                            | Peroxiredoxin-6                            | Peroxiredoxin-6                                    |
| Phosphatidylethanolamine-binding protein 1         | Phosphatidylethanolamine-binding protein 1 | Phosphatidylethanolamine-binding protein 1 |                                                    |
|                                                    |                                            |                                            | Phosphoglycerate mutase 1                          |
| Plasminogen activator inhibitor 1 RNA-binding prot |                                            |                                            | Plasminogen activator inhibitor 1 RNA-binding prot |
| Poly(rC)-binding protein 1                         | Poly(rC)-binding protein 1                 | Poly(rC)-binding protein 1                 | Poly(rC)-binding protein 1                         |
| Poly(rC)-binding protein 2                         | Poly(rC)-binding protein 2                 |                                            | Poly(rC)-binding protein 2                         |
| Poly(rC)-binding protein 3                         | Poly(rC)-binding protein 3                 |                                            | Poly(rC)-binding protein 3                         |
| Polyadenylate-binding protein 1                    | Polyadenylate-binding protein 1            | Polyadenylate-binding protein 1            | Polyadenylate-binding protein 1                    |
| Polyadenylate-binding protein 3                    | Polyadenylate-binding protein 3            | Polyadenylate-binding protein 3            | Polyadenylate-binding protein 3                    |
| Proactivator polypeptide                           | Proactivator polypeptide                   | Proactivator polypeptide                   | Proactivator polypeptide                           |
| Profilin-1                                         | Profilin-1                                 | Profilin-1                                 | Profilin-1                                         |
| Protein CDV3 homolog                               |                                            | Protein CDV3 homolog                       |                                                    |
| Protein SET                                        |                                            | Protein SET                                | Protein SET                                        |
| Protein S100-A11                                   |                                            |                                            | Protein S100-A11                                   |
| Protein disulfide-isomerase                        | Protein disulfide-isomerase                | Protein disulfide-isomerase                | Protein disulfide-isomerase                        |
| Protein disulfide-isomerase A3                     | Protein disulfide-isomerase A3             | Protein disulfide-isomerase A3             | Protein disulfide-isomerase A3                     |
| Protein disulfide-isomerase A6                     | Protein disulfide-isomerase A6             | Protein disulfide-isomerase A6             | Protein disulfide-isomerase A6                     |
| Pyruvate kinase isozymes M1/M2                     | Pyruvate kinase isozymes M1/M2             | Pyruvate kinase isozymes M1/M2             | Pyruvate kinase isozymes M1/M2                     |
|                                                    | Radixin                                    |                                            | Radixin                                            |
|                                                    |                                            |                                            | Ras-related protein Rab-1B                         |

|                                                    |                                                    |                                           |                                            |
|----------------------------------------------------|----------------------------------------------------|-------------------------------------------|--------------------------------------------|
|                                                    |                                                    |                                           | Ras-related protein Rab-10                 |
|                                                    |                                                    |                                           | Ras-related protein Rab-15                 |
|                                                    |                                                    |                                           | Rab GDP dissociation inhibitor beta        |
| RNA-binding protein EWS                            | RNA-binding protein EWS                            | RNA-binding protein EWS                   | RNA-binding protein EWS                    |
| RNA-binding protein FUS                            | RNA-binding protein FUS                            | RNA-binding protein FUS                   | RNA-binding protein FUS                    |
| RNA-binding motif protein, X-linked-like-2         | RNA-binding motif protein, X-linked-like-2         |                                           | RNA-binding motif protein, X-linked-like-2 |
| Reticulocalbin-1                                   |                                                    | Reticulocalbin-1                          |                                            |
| Reticulon-4                                        |                                                    | Reticulon-4                               |                                            |
| SH3 domain-binding glutamic acid-rich-like protein | SH3 domain-binding glutamic acid-rich-like protein |                                           |                                            |
| Serpin H1                                          | Serpin H1                                          | Serpin H1                                 | Serpin H1                                  |
|                                                    | Serum albumin                                      |                                           |                                            |
| Splicing factor 3B subunit 2                       | Splicing factor, arginine/serine-rich 3            |                                           | Splicing factor, arginine/serine-rich 3    |
| Splicing factor, arginine/serine-rich 3            |                                                    |                                           |                                            |
|                                                    |                                                    |                                           | Spliceosome RNA helicase BAT1              |
| Stathmin                                           |                                                    |                                           |                                            |
| Stress-induced-phosphoprotein 1                    | Stress-induced-phosphoprotein 1                    |                                           | Stress-induced-phosphoprotein 1            |
| T-complex protein 1 subunit gamma                  | T-complex protein 1 subunit gamma                  |                                           | T-complex protein 1 subunit beta           |
| TATA-binding protein-associated factor 2N          | TATA-binding protein-associated factor 2N          | TATA-binding protein-associated factor 2N | TATA-binding protein-associated factor 2N  |
| Thioredoxin                                        |                                                    |                                           |                                            |
| Thioredoxin reductase 1, cytoplasmic               | Thioredoxin reductase 1, cytoplasmic               | Thioredoxin reductase 1, cytoplasmic      | Thioredoxin reductase 1, cytoplasmic       |

|                           |                                           |                                          |                                           |
|---------------------------|-------------------------------------------|------------------------------------------|-------------------------------------------|
|                           | Thioredoxin domain-containing protein 5   |                                          |                                           |
|                           | Thioredoxin domain-containing protein 17  | Thioredoxin domain-containing protein 17 | Thioredoxin domain-containing protein 17  |
| Transgelin                | Transgelin                                | Transgelin                               | Transgelin                                |
| Transgelin-2              | Transgelin-2                              | Transgelin-2                             | Transgelin-2                              |
| Transketolase             | Transketolase                             | Transketolase                            | Transketolase                             |
| Triosephosphate isomerase | Triosephosphate isomerase                 | Triosephosphate isomerase                | Triosephosphate isomerase                 |
|                           | Transitional endoplasmic reticulum ATPase |                                          | Transitional endoplasmic reticulum ATPase |
| Tropomyosin alpha-1 chain |                                           |                                          |                                           |
| Tropomyosin alpha-3 chain |                                           |                                          | Tropomyosin alpha-3 chain                 |
| Tropomyosin alpha-4 chain |                                           | Tropomyosin alpha-4 chain                | Tropomyosin alpha-4 chain                 |
| Tropomyosin beta chain    |                                           |                                          | Tropomyosin beta chain                    |
| Tubulin alpha-1A chain    |                                           |                                          |                                           |
| Tubulin alpha-1B chain    | Tubulin alpha-1A chain                    | Tubulin alpha-1A chain                   | Tubulin alpha-1A chain                    |
| Tubulin alpha-1C chain    | Tubulin alpha-1B chain                    | Tubulin alpha-1B chain                   | Tubulin alpha-1B chain                    |
|                           | Tubulin alpha-1C chain                    | Tubulin alpha-1C chain                   | Tubulin alpha-1C chain                    |
| Tubulin alpha-3C/D chain  | Tubulin alpha-3C/D chain                  | Tubulin alpha-3C/D chain                 | Tubulin alpha-3C/D chain                  |
| Tubulin alpha-3E chain    | Tubulin alpha-3E chain                    | Tubulin alpha-3E chain                   | Tubulin alpha-3E chain                    |
| Tubulin alpha-4A chain    | Tubulin alpha-4A chain                    | Tubulin alpha-4A chain                   | Tubulin alpha-4A chain                    |
|                           | Tubulin alpha-8 chain                     |                                          | Tubulin alpha-8 chain                     |
| Tubulin beta chain        | Tubulin beta chain                        | Tubulin beta chain                       | Tubulin beta chain                        |
|                           | Tubulin beta-1 chain                      |                                          | Tubulin beta-1 chain                      |

|                                                  |                                                  |                                                  |                                                  |
|--------------------------------------------------|--------------------------------------------------|--------------------------------------------------|--------------------------------------------------|
| Tubulin beta-2A chain                            | Tubulin beta-2A chain                            | Tubulin beta-2A chain                            | Tubulin beta-2A chain                            |
| Tubulin beta-2B chain                            | Tubulin beta-2B chain                            | Tubulin beta-2B chain                            | Tubulin beta-2B chain                            |
| Tubulin beta-2C chain                            | Tubulin beta-2C chain                            | Tubulin beta-2C chain                            | Tubulin beta-2C chain                            |
| Tubulin beta-3 chain                             | Tubulin beta-3 chain                             | Tubulin beta-3 chain                             | Tubulin beta-3 chain                             |
| Tubulin beta-4 chain                             | Tubulin beta-4 chain                             | Tubulin beta-4 chain                             | Tubulin beta-4 chain                             |
| Tubulin beta-6 chain                             |                                                  |                                                  | Tubulin beta-6 chain                             |
| Tubulin-specific chaperone A                     | Tubulin-specific chaperone A                     | Tubulin-specific chaperone A                     | Tubulin-specific chaperone A                     |
| Ubiquitin                                        | Ubiquitin                                        | Ubiquitin                                        | Ubiquitin                                        |
| Ubiquitin carboxyl-terminal hydrolase isozyme L1 |
| Ubiquitin-conjugating enzyme E2 variant 1        | Ubiquitin-conjugating enzyme E2 variant 1        |                                                  | Ubiquitin-conjugating enzyme E2 variant 1        |
|                                                  |                                                  |                                                  | Ubiquitin-conjugating enzyme E2 variant 2        |
| vimentin                                         | vimentin                                         | vimentin                                         | vimentin                                         |
| Zyxin                                            | Zyxin                                            |                                                  | Zyxin                                            |

**Tab S1B.** Proteins pulled down by agarose-conjugated PKG-1 antibody.

| Control                                   | PE                                       | Cu                                        | PE+Cu                                          |
|-------------------------------------------|------------------------------------------|-------------------------------------------|------------------------------------------------|
| 60 kDa heat shock protein, mitochondrial  | 60 kDa heat shock protein, mitochondrial | 60 kDa heat shock protein, mitochondrial  | 60 kDa heat shock protein, mitochondrial       |
| ATP synthase subunit alpha, mitochondrial |                                          | ATP synthase subunit alpha, mitochondrial | ATP synthase subunit alpha, mitochondrial      |
|                                           | ATP synthase subunit beta, mitochondrial | ATP synthase subunit beta, mitochondrial  | ATP synthase subunit beta, mitochondrial       |
|                                           |                                          |                                           | ATP synthase subunit O, mitochondrial          |
| Malate dehydrogenase, mitochondrial       | Malate dehydrogenase, mitochondrial      | Malate dehydrogenase, mitochondrial       | Malate dehydrogenase, mitochondrial            |
|                                           |                                          |                                           | Serine hydroxymethyltransferase, mitochondrial |
| 14-3-3 protein beta/alpha                 | 14-3-3 protein beta/alpha                | 14-3-3 protein beta/alpha                 | 14-3-3 protein beta/alpha                      |
| 14-3-3 protein gamma                      | 14-3-3 protein gamma                     | 14-3-3 protein gamma                      | 14-3-3 protein gamma                           |
| 14-3-3 protein epsilon                    | 14-3-3 protein epsilon                   | 14-3-3 protein epsilon                    | 14-3-3 protein epsilon                         |
|                                           | 14-3-3 protein eta                       | 14-3-3 protein eta                        | 14-3-3 protein eta                             |
| 14-3-3 protein zeta/delta                 | 14-3-3 protein zeta/delta                | 14-3-3 protein zeta/delta                 | 14-3-3 protein zeta/delta                      |
| 14-3-3 protein theta                      | 14-3-3 protein theta                     | 14-3-3 protein theta                      | 14-3-3 protein theta                           |
|                                           |                                          |                                           | 26S proteasome non-ATPase regulatory subunit   |
|                                           | 40S ribosomal protein SA                 | 40S ribosomal protein SA                  | 40S ribosomal protein SA                       |
|                                           | 40S ribosomal protein S2                 | 40S ribosomal protein S2                  | 40S ribosomal protein S2                       |
| 40S ribosomal protein S3                  | 40S ribosomal protein S3                 | 40S ribosomal protein S3                  | 40S ribosomal protein S3                       |
|                                           |                                          | 40S ribosomal protein S5                  | 40S ribosomal protein S5                       |
|                                           |                                          | 40S ribosomal protein S6                  | 40S ribosomal protein S6                       |
| 40S ribosomal protein S12                 | 40S ribosomal protein S12                | 40S ribosomal protein S12                 | 40S ribosomal protein S12                      |
| 40S ribosomal protein S18                 | 40S ribosomal protein S18                | 40S ribosomal protein S18                 | 40S ribosomal protein S18                      |
|                                           |                                          |                                           | 40S ribosomal protein S19                      |
| 40S ribosomal protein S20                 | 40S ribosomal protein S20                |                                           |                                                |

|                                  |                                                    |                                      |                                                    |
|----------------------------------|----------------------------------------------------|--------------------------------------|----------------------------------------------------|
|                                  |                                                    | 40S ribosomal protein S24            |                                                    |
|                                  |                                                    |                                      | 40S ribosomal protein S26                          |
| 40S ribosomal protein S28        | 40S ribosomal protein S28                          | 40S ribosomal protein S28            | 40S ribosomal protein S28                          |
|                                  | 60S ribosomal protein L4                           | 60S ribosomal protein L4             | 60S ribosomal protein L4                           |
|                                  |                                                    | 60S ribosomal protein L6             |                                                    |
|                                  | 60S ribosomal protein L7                           |                                      | 60S ribosomal protein L7                           |
|                                  |                                                    |                                      | 60S ribosomal protein L11                          |
|                                  |                                                    |                                      | 60S ribosomal protein L12                          |
| 60S ribosomal protein L17        |                                                    |                                      |                                                    |
|                                  |                                                    |                                      | 60S ribosomal protein L23                          |
| 60S ribosomal protein L23a       |                                                    | 60S ribosomal protein L23a           |                                                    |
| 60S ribosomal protein L24        |                                                    |                                      | 60S ribosomal protein L24                          |
| 60S ribosomal protein L27a       | 60S ribosomal protein L27a                         |                                      |                                                    |
|                                  | 60S acidic ribosomal protein P0-like               | 60S acidic ribosomal protein P0-like |                                                    |
|                                  | 60S acidic ribosomal protein P0                    | 60S acidic ribosomal protein P0      | 60S acidic ribosomal protein P0                    |
|                                  |                                                    |                                      | 60S acidic ribosomal protein P1                    |
|                                  | 60S acidic ribosomal protein P2                    | 60S acidic ribosomal protein P2      | 60S acidic ribosomal protein P2                    |
| 78 kDa glucose-regulated protein | 78 kDa glucose-regulated protein                   | 78 kDa glucose-regulated protein     | 78 kDa glucose-regulated protein                   |
| Protein S100-A6                  |                                                    |                                      |                                                    |
| Protein S100-A7                  |                                                    |                                      |                                                    |
| Protein S100-A7A                 |                                                    |                                      |                                                    |
| Protein S100-A8                  |                                                    |                                      |                                                    |
| Protein S100-A9                  |                                                    |                                      |                                                    |
| Protein S100-A11                 | Protein S100-A11                                   | Protein S100-A11                     | Protein S100-A11                                   |
|                                  | SH3 domain-binding glutamic acid-rich-like protein |                                      | SH3 domain-binding glutamic acid-rich-like protein |
| UPF0568 protein C14orf166        | UPF0568 protein C14orf166                          | UPF0568 protein C14orf166            | UPF0568 protein C14orf166                          |

|                                       |                                       |                                       |                                       |
|---------------------------------------|---------------------------------------|---------------------------------------|---------------------------------------|
|                                       | UPF0027 protein C22orf28              |                                       | UPF0027 protein C22orf28              |
| Alpha-actinin-1                       | Alpha-actinin-1                       | Alpha-actinin-1                       | Alpha-actinin-1                       |
|                                       |                                       |                                       | Alpha-actinin-2                       |
| Alpha-actinin-4                       | Alpha-actinin-4                       | Alpha-actinin-4                       | Alpha-actinin-4                       |
| Adenylyl cyclase-associated protein 1 |
| Annexin A1                            | Annexin A1                            | Annexin A1                            | Annexin A1                            |
| Annexin A2                            | Annexin A2                            | Annexin A2                            | Annexin A2                            |
| Putative annexin A2-like protein      |
| Annexin A5                            | Annexin A5                            | Annexin A5                            | Annexin A5                            |
|                                       | Annexin A6                            | Annexin A6                            | Annexin A6                            |
| Actin, cytoplasmic 1                  | Actin, cytoplasmic 1                  | Actin, cytoplasmic 1                  | Actin, cytoplasmic 1                  |
| Actin, cytoplasmic 2                  | Actin, cytoplasmic 2                  | Actin, cytoplasmic 2                  | Actin, cytoplasmic 2                  |
|                                       | Actin-related protein 3               | Actin-related protein 3               | Actin-related protein 3               |
| Actin, aortic smooth muscle           |
| Actin, alpha cardiac muscle 1         |
| Actin, gamma-enteric smooth muscle    |
| Actin, alpha skeletal muscle          |
| ADP-ribosylation factor 1             | ADP-ribosylation factor 1             | ADP-ribosylation factor 1             | ADP-ribosylation factor 1             |
| ADP-ribosylation factor 3             | ADP-ribosylation factor 3             | ADP-ribosylation factor 3             | ADP-ribosylation factor 3             |
| ADP-ribosylation factor 4             | ADP-ribosylation factor 4             | ADP-ribosylation factor 4             | ADP-ribosylation factor 4             |
| ADP-ribosylation factor 5             | ADP-ribosylation factor 5             | ADP-ribosylation factor 5             | ADP-ribosylation factor 5             |
|                                       |                                       |                                       | ADP/ATP translocase 1                 |
|                                       |                                       | ADP/ATP translocase 2                 | ADP/ATP translocase 2                 |
| ADP/ATP translocase 3                 |                                       | ADP/ATP translocase 3                 | ADP/ATP translocase 3                 |
| Apolipoprotein D                      |                                       |                                       |                                       |
| ATP-dependent RNA helicase DDX3X      |                                       |                                       |                                       |

|                                               |                                           |                                               |                                               |
|-----------------------------------------------|-------------------------------------------|-----------------------------------------------|-----------------------------------------------|
| Beta-actin-like protein 2                     | Beta-actin-like protein 2                 | Beta-actin-like protein 2                     | Beta-actin-like protein 2                     |
| Beta-actin-like protein 3                     | Beta-actin-like protein 3                 | Beta-actin-like protein 3                     | Beta-actin-like protein 3                     |
| Brain acid soluble protein 1                  | Brain acid soluble protein 1              | Brain acid soluble protein 1                  | Brain acid soluble protein 1                  |
| Calmodulin                                    | Calmodulin                                | Calmodulin                                    | Calmodulin                                    |
|                                               | Calpain small subunit 1                   | Calpain small subunit 1                       | Calpain small subunit 1                       |
| Calponin-2                                    | Calponin-2                                | Calponin-2                                    | Calponin-2                                    |
| Calponin-3                                    | Calponin-3                                |                                               | Calponin-3                                    |
|                                               |                                           |                                               | Calreticulin                                  |
|                                               | Calumenin                                 |                                               | Calumenin                                     |
|                                               | Cathepsin B                               |                                               | Cathepsin B                                   |
|                                               |                                           | Cathepsin D                                   | Cathepsin D                                   |
| Chloride intracellular channel protein 1      | Chloride intracellular channel protein 1  | Chloride intracellular channel protein 1      | Chloride intracellular channel protein 1      |
|                                               |                                           | Chloride intracellular channel protein 4      | Chloride intracellular channel protein 4      |
|                                               | Clathrin heavy chain 1                    | Clathrin heavy chain 1                        | Clathrin heavy chain 1                        |
|                                               |                                           | Coatomer subunit beta                         |                                               |
| Cofilin-1                                     | Cofilin-1                                 | Cofilin-1                                     | Cofilin-1                                     |
| Cofilin-2                                     | Cofilin-2                                 |                                               |                                               |
| Complement C3                                 |                                           |                                               |                                               |
| Complement C4-A                               |                                           |                                               |                                               |
| Complement C4-B                               |                                           |                                               |                                               |
| Cullin-associated NEDD8-dissociated protein 1 |                                           | Cullin-associated NEDD8-dissociated protein 1 | Cullin-associated NEDD8-dissociated protein 1 |
|                                               | Cytochrome c                              |                                               |                                               |
| Elongation factor 1-alpha 1                   | Elongation factor 1-alpha 1               | Elongation factor 1-alpha 1                   | Elongation factor 1-alpha 1                   |
| Putative elongation factor 1-alpha-like 3     | Putative elongation factor 1-alpha-like 3 | Putative elongation factor 1-alpha-like 3     | Putative elongation factor 1-alpha-like 3     |
|                                               | Elongation factor 1-beta                  | Elongation factor 1-beta                      | Elongation factor 1-beta                      |
| Elongation factor 2                           | Elongation factor 2                       | Elongation factor 2                           | Elongation factor 2                           |



|                                                    |                                                    |                                                    |                                                    |
|----------------------------------------------------|----------------------------------------------------|----------------------------------------------------|----------------------------------------------------|
| Elongation factor 1-alpha 2                        |
| Elongation factor 1-delta                          | Elongation factor 1-delta                          | Elongation factor 1-delta                          | Elongation factor 1-delta                          |
|                                                    | Elongation factor 1-gamma                          | Elongation factor 1-gamma                          | Elongation factor 1-gamma                          |
| Endoplasmin                                        | Endoplasmin                                        | Endoplasmin                                        | Endoplasmin                                        |
| Alpha-enolase                                      | Alpha-enolase                                      | Alpha-enolase                                      | Alpha-enolase                                      |
| Beta-enolase                                       | Beta-enolase                                       | Beta-enolase                                       | Beta-enolase                                       |
| Gamma-enolase                                      | Gamma-enolase                                      | Gamma-enolase                                      | Gamma-enolase                                      |
| Eukaryotic initiation factor 4A-I                  |
| Eukaryotic initiation factor 4A-II                 |
| Eukaryotic translation initiation factor 5A-1      |
| Eukaryotic translation initiation factor 5A-1-like |
| Eukaryotic translation initiation factor 5A-2      |
| Exportin-2                                         |                                                    | Exportin-2                                         |                                                    |
|                                                    |                                                    |                                                    | Ezrin                                              |
|                                                    |                                                    | F-actin-capping protein subunit alpha-1            | F-actin-capping protein subunit alpha-1            |
|                                                    |                                                    | Filamin-A                                          | Filamin-A                                          |
|                                                    |                                                    |                                                    | Filamin-B                                          |
|                                                    |                                                    |                                                    | Filamin-C                                          |
| Fructose-bisphosphate aldolase A                   | Fructose-bisphosphate aldolase A                   | Fructose-bisphosphate aldolase A                   | Fructose-bisphosphate aldolase A                   |
| Galectin-1                                         | Galectin-1                                         | Galectin-1                                         | Galectin-1                                         |
| Glucose-6-phosphate isomerase                      | Glucose-6-phosphate isomerase                      | Glucose-6-phosphate isomerase                      | Glucose-6-phosphate isomerase                      |
|                                                    | Glutathione S-transferase omega-1                  |                                                    |                                                    |
| Glutathione S-transferase P                        | Glutathione S-transferase P                        | Glutathione S-transferase P                        | Glutathione S-transferase P                        |
| Glyceraldehyde-3-phosphate dehydrogenase           | Glyceraldehyde-3-phosphate dehydrogenase           | Glyceraldehyde-3-phosphate dehydrogenase           | Glyceraldehyde-3-phosphate dehydrogenase           |

|                                                |                                                     |                                                    |                                                    |
|------------------------------------------------|-----------------------------------------------------|----------------------------------------------------|----------------------------------------------------|
|                                                | Guanine nucleotide-binding protein subunit beta-2-l |                                                    |                                                    |
| GTP-binding nuclear protein Ran                | GTP-binding nuclear protein Ran                     | GTP-binding nuclear protein Ran                    | GTP-binding nuclear protein Ran                    |
| Heat shock protein HSP 90-alpha                | Heat shock protein HSP 90-alpha                     | Heat shock protein HSP 90-alpha                    | Heat shock protein HSP 90-alpha                    |
| Heat shock protein HSP 90-beta                 | Heat shock protein HSP 90-beta                      | Heat shock protein HSP 90-beta                     | Heat shock protein HSP 90-beta                     |
|                                                | Heat shock protein beta-1                           | Heat shock protein beta-1                          |                                                    |
| Heat shock-related 70 kDa protein 2            | Heat shock-related 70 kDa protein 2                 | Heat shock-related 70 kDa protein 2                | Heat shock-related 70 kDa protein 2                |
|                                                |                                                     |                                                    | Heat shock 70 kDa protein 1                        |
|                                                | Heat shock 70 kDa protein 6                         | Heat shock 70 kDa protein 6                        | Heat shock 70 kDa protein 6                        |
|                                                |                                                     |                                                    | Putative heat shock 70 kDa protein 7               |
|                                                |                                                     |                                                    | Heat shock 70 kDa protein 1L                       |
| Heat shock cognate 71 kDa protein              | Heat shock cognate 71 kDa protein                   | Heat shock cognate 71 kDa protein                  | Heat shock cognate 71 kDa protein                  |
| Putative heat shock protein HSP 90-alpha A2    | Putative heat shock protein HSP 90-alpha A2         | Putative heat shock protein HSP 90-alpha A2        | Putative heat shock protein HSP 90-alpha A2        |
| Putative heat shock protein HSP 90-beta 2      | Putative heat shock protein HSP 90-beta 2           | Putative heat shock protein HSP 90-beta 2          | Putative heat shock protein HSP 90-beta 2          |
| Putative heat shock protein HSP 90-beta-3      | Putative heat shock protein HSP 90-beta-3           | Putative heat shock protein HSP 90-beta-3          | Putative heat shock protein HSP 90-beta-3          |
|                                                | Putative heat shock protein HSP 90-beta 4           |                                                    | Putative heat shock protein HSP 90-beta 4          |
|                                                | Heterogeneous nuclear ribonucleoprotein A1          | Heterogeneous nuclear ribonucleoprotein A1         | Heterogeneous nuclear ribonucleoprotein A1         |
|                                                | Putative heterogeneous nuclear ribonucleoprotein A  | Putative heterogeneous nuclear ribonucleoprotein A | Putative heterogeneous nuclear ribonucleoprotein A |
|                                                | Heterogeneous nuclear ribonucleoprotein A1-like     | Heterogeneous nuclear ribonucleoprotein A1-like    | Heterogeneous nuclear ribonucleoprotein A1-like    |
|                                                |                                                     | Heterogeneous nuclear ribonucleoprotein A/B        |                                                    |
| Heterogeneous nuclear ribonucleoproteins A2/B1 | Heterogeneous nuclear ribonucleoproteins A2/B1      | Heterogeneous nuclear ribonucleoproteins A2/B1     | Heterogeneous nuclear ribonucleoproteins A2/B1     |

|                                                |                                                  |                                                |                                                  |
|------------------------------------------------|--------------------------------------------------|------------------------------------------------|--------------------------------------------------|
|                                                | Heterogeneous nuclear ribonucleoprotein C-like 1 |                                                | Heterogeneous nuclear ribonucleoprotein C-like 1 |
| Heterogeneous nuclear ribonucleoproteins C1/C2 | Heterogeneous nuclear ribonucleoproteins C1/C2   | Heterogeneous nuclear ribonucleoproteins C1/C2 | Heterogeneous nuclear ribonucleoproteins C1/C2   |
|                                                | Heterogeneous nuclear ribonucleoprotein D0       | Heterogeneous nuclear ribonucleoprotein D0     | Heterogeneous nuclear ribonucleoprotein D0       |
|                                                |                                                  |                                                | Heterogeneous nuclear ribonucleoprotein D-like   |
| Heterogeneous nuclear ribonucleoprotein K      | Heterogeneous nuclear ribonucleoprotein K        | Heterogeneous nuclear ribonucleoprotein K      | Heterogeneous nuclear ribonucleoprotein K        |
|                                                | Heterogeneous nuclear ribonucleoprotein M        |                                                |                                                  |
|                                                | Histone H2A type 1                               | Histone H2A type 1                             |                                                  |
|                                                | Histone H2A type 1-B/E                           | Histone H2A type 1-B/E                         |                                                  |
|                                                | Histone H2A type 1-C                             | Histone H2A type 1-C                           |                                                  |
|                                                | Histone H2A type 1-D                             | Histone H2A type 1-D                           |                                                  |
|                                                | Histone H2A type 1-H                             | Histone H2A type 1-H                           |                                                  |
|                                                | Histone H2A type 1-J                             | Histone H2A type 1-J                           |                                                  |
|                                                | Histone H2A type 2-A                             | Histone H2A type 2-A                           |                                                  |
|                                                | Histone H2A type 2-C                             | Histone H2A type 2-C                           |                                                  |
|                                                | Histone H2A type 3                               | Histone H2A type 3                             |                                                  |
|                                                | Histone H2A.J                                    | Histone H2A.J                                  |                                                  |
|                                                |                                                  | Importin-5                                     | Importin-5                                       |
|                                                |                                                  | Importin subunit alpha-2                       |                                                  |
| Importin subunit beta-1                        | Importin subunit beta-1                          | Importin subunit beta-1                        | Importin subunit beta-1                          |
|                                                |                                                  |                                                | Integrin beta-1                                  |
|                                                | Latexin                                          | Latexin                                        | Latexin                                          |
| L-lactate dehydrogenase A chain                | L-lactate dehydrogenase A chain                  | L-lactate dehydrogenase A chain                | L-lactate dehydrogenase A chain                  |
| L-lactate dehydrogenase B chain                | L-lactate dehydrogenase B chain                  | L-lactate dehydrogenase B chain                | L-lactate dehydrogenase B chain                  |

|                                                     |                                                     |                                                     |                                                     |
|-----------------------------------------------------|-----------------------------------------------------|-----------------------------------------------------|-----------------------------------------------------|
| Lysosome-associated membrane glycoprotein 2         |                                                     | Lysosome-associated membrane glycoprotein 2         |                                                     |
|                                                     |                                                     |                                                     | Malate dehydrogenase, cytoplasmic                   |
|                                                     | Moesin                                              | Moesin                                              | Moesin                                              |
| Myosin-9                                            | Myosin-9                                            | Myosin-9                                            | Myosin-9                                            |
| Myosin-10                                           |                                                     | Myosin-10                                           | Myosin-10                                           |
| Myosin-11                                           | Myosin-11                                           | Myosin-11                                           | Myosin-11                                           |
| Myosin-14                                           | Myosin-14                                           | Myosin-14                                           | Myosin-14                                           |
| Myosin light polypeptide 6                          |
| Myosin light chain 6B                               |
| Myosin regulatory light chain 12A                   |
| Myosin regulatory light chain 12B                   |
| Myosin regulatory light polypeptide 9               |
| Myristoylated alanine-rich C-kinase substrate       |
|                                                     |                                                     |                                                     | Multifunctional protein ADE2                        |
|                                                     |                                                     |                                                     | NAD(P)H dehydrogenase [quinone] 1                   |
| Nicotinamide N-methyltransferase                    | Nicotinamide N-methyltransferase                    | Nicotinamide N-methyltransferase                    | Nicotinamide N-methyltransferase                    |
| Neuroblast differentiation-associated protein AHNAK |
|                                                     | Nucleophosmin                                       | Nucleophosmin                                       | Nucleophosmin                                       |
|                                                     |                                                     |                                                     | Nuclease-sensitive element-binding protein 1        |
|                                                     | Putative nucleoside diphosphate kinase              |                                                     |                                                     |
|                                                     | Nucleoside diphosphate kinase B                     |                                                     |                                                     |
| POTE ankyrin domain family member E                 |
| POTE ankyrin domain family member F                 |
| Peptidyl-prolyl cis-trans isomerase A               |

|                                        |                                       |                                       |                                       |
|----------------------------------------|---------------------------------------|---------------------------------------|---------------------------------------|
| Peptidyl-prolyl cis-trans isomerase B  | Peptidyl-prolyl cis-trans isomerase B | Peptidyl-prolyl cis-trans isomerase B | Peptidyl-prolyl cis-trans isomerase B |
| Peroxiredoxin-1                        | Peroxiredoxin-1                       | Peroxiredoxin-1                       | Peroxiredoxin-1                       |
| Peroxiredoxin-6                        | Peroxiredoxin-6                       | Peroxiredoxin-6                       |                                       |
|                                        | Peripherin                            | Peripherin                            | Peripherin                            |
| Phosphoglycerate kinase 1              | Phosphoglycerate kinase 1             | Phosphoglycerate kinase 1             | Phosphoglycerate kinase 1             |
|                                        | Phosphoglycerate mutase 1             | Phosphoglycerate mutase 1             | Phosphoglycerate mutase 1             |
|                                        | Phosphoglycerate mutase 2             |                                       | Phosphoglycerate mutase 2             |
|                                        | Probable phosphoglycerate mutase 4    |                                       | Probable phosphoglycerate mutase 4    |
|                                        |                                       |                                       | Proteasome subunit beta type-3        |
| Plastin-3                              | Plastin-3                             | Plastin-3                             |                                       |
|                                        |                                       | Polyadenylate-binding protein 1       |                                       |
| Proactivator polypeptide               | Proactivator polypeptide              | Proactivator polypeptide              | Proactivator polypeptide              |
| Profilin-1                             | Profilin-1                            | Profilin-1                            | Profilin-1                            |
| Prolactin-inducible protein            |                                       |                                       |                                       |
| Proteasome activator complex subunit 2 |                                       |                                       |                                       |
| Protein disulfide-isomerase            | Protein disulfide-isomerase           | Protein disulfide-isomerase           | Protein disulfide-isomerase           |
| Protein disulfide-isomerase A3         | Protein disulfide-isomerase A3        | Protein disulfide-isomerase A3        | Protein disulfide-isomerase A3        |
|                                        | Protein disulfide-isomerase A4        |                                       |                                       |
|                                        | Protein disulfide-isomerase A6        | Protein disulfide-isomerase A6        | Protein disulfide-isomerase A6        |
| Pyruvate kinase isozymes M1/M2         | Pyruvate kinase isozymes M1/M2        | Pyruvate kinase isozymes M1/M2        | Pyruvate kinase isozymes M1/M2        |
|                                        | Poly(rC)-binding protein 1            | Poly(rC)-binding protein 1            | Poly(rC)-binding protein 1            |
|                                        | Poly(rC)-binding protein 2            | Poly(rC)-binding protein 2            | Poly(rC)-binding protein 2            |
|                                        | Poly(rC)-binding protein 3            |                                       |                                       |
|                                        |                                       | Rab GDP dissociation inhibitor alpha  | Rab GDP dissociation inhibitor alpha  |
|                                        |                                       | Rab GDP dissociation inhibitor beta   | Rab GDP dissociation inhibitor beta   |
|                                        |                                       |                                       | Radixin                               |
|                                        |                                       |                                       | Ras-related protein Rab-5C            |

|                                         |                                   |                                                |                                                |
|-----------------------------------------|-----------------------------------|------------------------------------------------|------------------------------------------------|
| Ras-related protein Rab-10              | Ras-related protein Rab-10        | Ras-related protein Rab-10                     | Ras-related protein Rab-10                     |
|                                         |                                   | Ras-related protein Rab-1A                     | Ras-related protein Rab-1A                     |
|                                         | Ras-related protein Rab-1B        | Ras-related protein Rab-1B                     | Ras-related protein Rab-1B                     |
|                                         | Ras-related protein Rab-15        | Ras-related protein Rab-15                     | Ras-related protein Rab-15                     |
|                                         |                                   | Putative Ras-related protein Rab-1C            | Putative Ras-related protein Rab-1C            |
|                                         |                                   |                                                | Ras-related C3 botulinum toxin substrate       |
|                                         |                                   |                                                | Ras-related C3 botulinum toxin substrate 3     |
| Reticulon-4                             | Reticulon-4                       | Reticulon-4                                    | Reticulon-4                                    |
|                                         |                                   | Rho GDP-dissociation inhibitor 1               |                                                |
|                                         |                                   | Ribonuclease inhibitor                         |                                                |
| RNA-binding protein EWS                 |                                   |                                                |                                                |
| RNA-binding protein FUS                 |                                   | RNA-binding protein FUS                        |                                                |
| Sacsin                                  |                                   |                                                |                                                |
| Serpin H1                               | Serpin H1                         | Serpin H1                                      | Serpin H1                                      |
|                                         |                                   | Serine/threonine-protein phosphatase 2A 65 kDa | Serine/threonine-protein phosphatase 2A 65 kDa |
|                                         |                                   |                                                | Sorcin                                         |
| T-complex protein 1 subunit beta        | T-complex protein 1 subunit beta  | T-complex protein 1 subunit beta               | T-complex protein 1 subunit beta               |
| T-complex protein 1 subunit gamma       | T-complex protein 1 subunit gamma | T-complex protein 1 subunit gamma              | T-complex protein 1 subunit gamma              |
|                                         |                                   |                                                | T-complex protein 1 subunit delta              |
|                                         | T-complex protein 1 subunit theta | T-complex protein 1 subunit theta              | T-complex protein 1 subunit theta              |
|                                         |                                   | T-complex protein 1 subunit eta                | T-complex protein 1 subunit eta                |
|                                         |                                   |                                                | T-complex protein 1 subunit epsilon            |
| Thioredoxin                             | Thioredoxin                       | Thioredoxin                                    |                                                |
| Thioredoxin domain-containing protein 5 |                                   | Thioredoxin domain-containing protein 5        |                                                |
| Transgelin                              | Transgelin                        | Transgelin                                     | Transgelin                                     |

|                                        |                                        |                                           |                                          |
|----------------------------------------|----------------------------------------|-------------------------------------------|------------------------------------------|
| Transgelin-2                           | Transgelin-2                           | Transgelin-2                              | Transgelin-2                             |
|                                        |                                        | Transitional endoplasmic reticulum ATPase |                                          |
|                                        |                                        |                                           | Translationally-controlled tumor protein |
|                                        | Transketolase                          | Transketolase                             | Transketolase                            |
| Triosephosphate isomerase              | Triosephosphate isomerase              | Triosephosphate isomerase                 | Triosephosphate isomerase                |
|                                        | Tropomyosin alpha-4 chain              | Tropomyosin alpha-4 chain                 |                                          |
| Tubulin alpha-1A chain                 | Tubulin alpha-1A chain                 | Tubulin alpha-1A chain                    | Tubulin alpha-1A chain                   |
| Tubulin alpha-1B chain                 | Tubulin alpha-1B chain                 | Tubulin alpha-1B chain                    | Tubulin alpha-1B chain                   |
| Tubulin alpha-1C chain                 | Tubulin alpha-1C chain                 | Tubulin alpha-1C chain                    | Tubulin alpha-1C chain                   |
| Tubulin alpha chain-like 3             | Tubulin alpha chain-like 3             | Tubulin alpha chain-like 3                | Tubulin alpha chain-like 3               |
| Tubulin alpha-3C/D chain               | Tubulin alpha-3C/D chain               | Tubulin alpha-3C/D chain                  | Tubulin alpha-3C/D chain                 |
| Tubulin alpha-3E chain                 | Tubulin alpha-3E chain                 | Tubulin alpha-3E chain                    | Tubulin alpha-3E chain                   |
| Tubulin alpha-4A chain                 | Tubulin alpha-4A chain                 | Tubulin alpha-4A chain                    | Tubulin alpha-4A chain                   |
| Tubulin alpha-8 chain                  | Tubulin alpha-8 chain                  | Tubulin alpha-8 chain                     | Tubulin alpha-8 chain                    |
| Tubulin beta chain                     | Tubulin beta chain                     | Tubulin beta chain                        | Tubulin beta chain                       |
|                                        | Tubulin beta-1 chain                   | Tubulin beta-1 chain                      |                                          |
| Tubulin beta-2C chain                  | Tubulin beta-2C chain                  | Tubulin beta-2C chain                     | Tubulin beta-2C chain                    |
|                                        | Tubulin beta-4 chain                   | Tubulin beta-4 chain                      | Tubulin beta-4 chain                     |
| Tubulin beta-8 chain                   | Tubulin beta-8 chain                   | Tubulin beta-8 chain                      | Tubulin beta-8 chain                     |
| Tubulin beta-8 chain B                 | Tubulin beta-8 chain B                 | Tubulin beta-8 chain B                    | Tubulin beta-8 chain B                   |
| Putative tubulin beta-4q chain         | Putative tubulin beta-4q chain         | Putative tubulin beta-4q chain            | Putative tubulin beta-4q chain           |
| Tubulin beta-2A chain                  | Tubulin beta-2A chain                  | Tubulin beta-2A chain                     | Tubulin beta-2A chain                    |
| Tubulin beta-2B chain                  | Tubulin beta-2B chain                  | Tubulin beta-2B chain                     | Tubulin beta-2B chain                    |
| Tubulin beta-3 chain                   | Tubulin beta-3 chain                   | Tubulin beta-3 chain                      | Tubulin beta-3 chain                     |
| Tubulin beta-6 chain                   | Tubulin beta-6 chain                   | Tubulin beta-6 chain                      | Tubulin beta-6 chain                     |
| Putative tubulin-like protein alpha-4B | Putative tubulin-like protein alpha-4B | Putative tubulin-like protein alpha-4B    | Putative tubulin-like protein alpha-4B   |

|                                                  |                                                  |                                                  |                                                  |
|--------------------------------------------------|--------------------------------------------------|--------------------------------------------------|--------------------------------------------------|
| Tubulin alpha chain-like 3                       |                                                  |                                                  |                                                  |
| Ubiquitin                                        |                                                  | Ubiquitin                                        |                                                  |
| Ubiquitin carboxyl-terminal hydrolase isozyme L1 |
|                                                  |                                                  |                                                  | Ubiquitin-conjugating enzyme E2 variant 1        |
|                                                  |                                                  |                                                  | Ubiquitin-conjugating enzyme E2 variant 2        |
| Ubiquitin-conjugating enzyme E2 N                |                                                  |                                                  |                                                  |
| vimentin                                         | vimentin                                         | vimentin                                         | vimentin                                         |
| Zinc-alpha-2-glycoprotein                        |                                                  |                                                  |                                                  |
